# Supplementary material for: COMPASS for rapid combinatorial optimization of biochemical pathways based on artificial transcription factors
Source: PubMed Central journal article supplement (PMC6565718; doi:10.1038/s41467-019-10224-x), 2019-06-13
Supplement: 41467_2019_10224_MOESM18_ESM.pdf [file 41467_2019_10224_MOESM18_ESM.pdf]

**Title:** Supplementary Data 1.  
**Description:** Comparison of various combinatorial cloning methodologies.

**Title:** Supplementary Data 2.  
**Description:** Position effects of plant-derived regulators.

**Title:** Supplementary Data 3.  
**Description:** List of COMPASS vectors.

**Title:** Supplementary Data 4.  
**Description:** PCR fragments used for the cloning of parts into Entry vector X.

**Title:** Supplementary Data 5.  
**Description:** Parts of genes assembled in Entry vector X.

**Title:** Supplementary Data 6.  
**Description:** Parts of genes assembled in entry vectors.

**Title:** Supplementary Data 7.  
**Description:** List of *Saccharomyces cerevisiae* strains used in this study.

**Title:** Supplementary Data 8.  
**Description:** High-precision flow cytometry for growth analysis.

**Title:** Supplementary Data 9.  
**Description:** Controllability of plant-derived regulators in COMPASS strains.

**Title:** Supplementary Data 10.  
**Description:** HPLC results for control strains.

**Title:** Supplementary Data 11.  
**Description:** Transcriptional output of the NLS-JUB1-EDLLAD-EDLLAD-derived ATF.

**Title:** Supplementary Data 12.  
**Description:** Primers used for sequencing the library integrated into the genome.

**Title:** Supplementary Data 13.  
**Description:** Diversity of  $\beta$ -ionone and NG production from a randomized ATF/BS library.

**Title:** Supplementary Data 14.  
**Description:** Sequences of vectors used in this study.

**Title:** Supplementary Data 15.  
**Description:** Sequences of primers used in this study.
